# Supplementary material for: Compound-specific adaptation of hepatoma cell lines to toxic iron
Source: Royal Society of Chemistry journal article supplement (doi:10.1039/c9mt00202b), 2019-01-01
Supplement: c9mt00202b1.pdf [file c9mt00202b1.pdf]

**Supplementary data to:**

**Compound-specific adaptation of hepatoma cell lines to toxic iron**

Sarah Guttman<sup>1</sup>, Elisabeth Therese Dewald<sup>1</sup>, Cathrin Wohlfarth<sup>1</sup>, Jennifer-Christin Müller<sup>2</sup>, Uwe Karst<sup>2</sup>, Hartmut H. Schmidt<sup>1</sup>, Andree Zibert<sup>1</sup>

<sup>1</sup>Medizinische Klinik B für Gastroenterologie und Hepatologie, Universitätsklinikum Münster, Münster, Germany

<sup>2</sup>Institute of Inorganic and Analytical Chemistry, University of Münster, Münster, Germany

**Supplementary Table 1.** Primers used for RT-qPCR analysis

| <b>Gene Symbol</b> | <b>Synonym</b>                          | <b>Accession Number</b> | <b>Forward/Reverse (5'-3')</b>              |
|--------------------|-----------------------------------------|-------------------------|---------------------------------------------|
| <b>BMP6</b>        | Bone morphogenetic protein 6            | NM_001718               | AGCCTGCAGGAAGCATGAG/AACCAAGGTCTGCACAATCG    |
| <b>CP</b>          | Ceruloplasmin                           | NM_000096               | CACGGCCATAGCTTCCAATAC/CCAAATTCCAGGTGTTCTTGG |
| <b>DMT1</b>        | Divalent metal transporter 1            | NM_001174127            | GGGTTGGCAATGTTTGATTG/GCGTCCATGGTGTTTCAGAAG  |
| <b>FBXL5</b>       | F-box and leucine rich repeat protein 5 | NM_012161               | CTGCAGGATTTGGTTTCAGC/CTGCAAATTCTGGCATCCAC   |
| <b>FPN1</b>        | Ferroportin 1 (SLC40A1)                 | NM_014585               | TGTCCCGGAGACAAGTCCTG/CAAAGGACCAAAGACCGATTC  |
| <b>FTH1</b>        | Ferritin heavy chain 1                  | NM_002032               | TGCACAAACTGGCCACTGAC/CGTGGTCACCCAATTCTTTG   |
| <b>FTL</b>         | Ferritin light chain                    | NM_000146               | GATCTTCATGCCCTGGGTTC/GGTGGTCACCCATCTTCTTG   |
| <b>FXN</b>         | Frxataxin                               | NM_000144               | CGCCAAACAAGCAAATCTGG/AGCAGCTCATGGAGGGACAC   |

---

|              |                                                       |              |                                             |
|--------------|-------------------------------------------------------|--------------|---------------------------------------------|
| <b>GAPDH</b> | Glyceraldehyde-3-phosphate dehydrogenase              | NM_002046    | CCCACTCCTCCACCTTTGAC/CCACCACCCTGTTGCTGTAG   |
| <b>HAMP</b>  | Hepcidin antimicrobial peptide                        | NM_021175    | CAACAGACGGGACAACCTTGC/CTTCGCCTCTGGAACATGG   |
| <b>HFE</b>   | Hemochromatosis                                       | NM_000410    | CGTCTGGCACCCCTAGTCATTG/TCTTGAACCCTGCCTCTTCC |
| <b>HIF1A</b> | Hypoxia inducible factor 1 alpha subunit              | NM_001530    | GGCAATCAATGGATGAAAGTG/CAGTAGGTTTCTGCTGCCTTG |
| <b>HMOX1</b> | Heme oxygenase 1                                      | NM_002133    | GAGCTGCTGACCCATGACAC/GGGCAGAATCTTGCACTTTG   |
| <b>HP</b>    | Haptoglobin                                           | NM_001126102 | GACACCTGGTATGCGACTGG/CCCAGTCCTGGATGGAAGTC   |
| <b>IRP1</b>  | Iron responsive element binding protein (Aconitase 1) | NM_001278352 | CACAGGGCAAGAACGATACAC/TGACAGCCTGGAAGGTCTTG  |
| <b>IRP2</b>  | Iron responsive element binding protein 2             | NM_004136    | CAGAGACTGGGCTGCCAAAG/GAAGTGGAGCTATGCCAATTCC |
| <b>LRP1</b>  | LDL receptor related protein 1                        | NM_002332    | CTGGTATAAGCGGCGAGTCC/GCTCTCCGCCTTCGTACATC   |
| <b>MDR1</b>  | Multi Drug Resistance Protein 1                       | NM_000927    | TCGTGCCCTTGTTAGACAGC/CCAAGAAGCCCTGGACAAAG   |

---

---

|                |                                      |              |                                              |
|----------------|--------------------------------------|--------------|----------------------------------------------|
| <b>MFRN2</b>   | Mitoferrin-2 (SLC25A28)              | NM_031212    | TCATGATGCAGCCATGAACC/GTCTGTCACCCGGTGGTATG    |
| <b>MT1</b>     | Metallothionein 1                    | NM_005952    | CTCCTTGCCTCGAAATGGAC/GCATTTCACACTCTTTGCATTTG |
| <b>NCOA4</b>   | Nuclear receptor<br>coactivator 4    | NM_001145260 | CCTGCCAGGAAAGAAGATGG/CTTCCTGGGCCTTCTTTTCG    |
| <b>NEO1</b>    | Neogenin 1                           | NM_002499    | GAAGTGCAGGAGACCACAAGG/AGGTGGGCCATCTCTTTGG    |
| <b>SLC13A5</b> | Solute carrier family 13<br>member 5 | NM_001143838 | GCATCGTGCTGCTACTAGGG/ CAAGGGCTCCATCTGCTTC    |
| <b>SOD2</b>    | Superoxide dismutase 2               | NM_000636    | CAAATTGCTGCTTGTCCAATC/TAAGCGTGCTCCCACACATC   |
| <b>TF</b>      | Transferrin                          | NM_001063    | GATAAGGAAGCTTGCGTCCAC/TTGCCCGAGCAGTCAGTTAC   |
| <b>TFR1</b>    | Transferrin receptor                 | NM_001128148 | GAGAGGTACAACAGCCAAGTGC/TGTAAACTCAGGCCCATTTCC |
| <b>TFR2</b>    | Transferrin receptor 2               | NM_003227    | AGAGACGAGCGACTGACACG/ATGAAGATGTGGCGGAACG     |

---

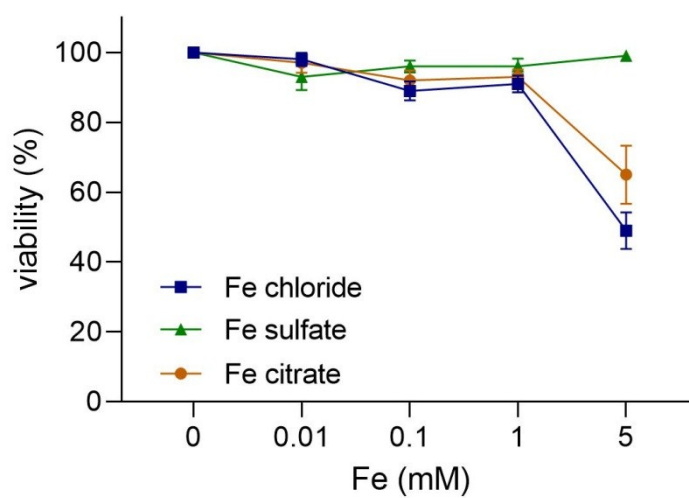

### Supplementary Figure S1

#### Compound-specific toxicity after long-term treatment of HepG2 cells.

HepG2 cells were cultivated in presence of Fe chloride, Fe sulfate or Fe citrate for 5 days and subjected to MTT assay. Viability of cells was determined relative to untreated cells (100%). Mean  $\pm$  SEM is given (n=3).

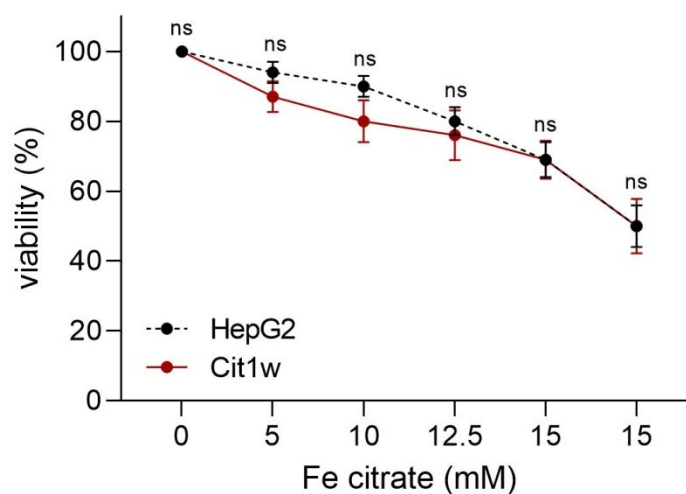

### Supplementary Figure S2

#### Weaned Cit1w cells are sensitive to iron citrate.

Cit1 cells that were cultivated in the absence of iron citrate (weaned) for several days were subjected to MTT assay. Cells were treated with iron for 48 h. Viability of cells was determined relative to untreated cells (100%). For comparison, results of parental HepG2 cells are denoted (dotted line). Mean  $\pm$  SEM is given (n=3). \* $P < 0.05$ . ns, not significant.

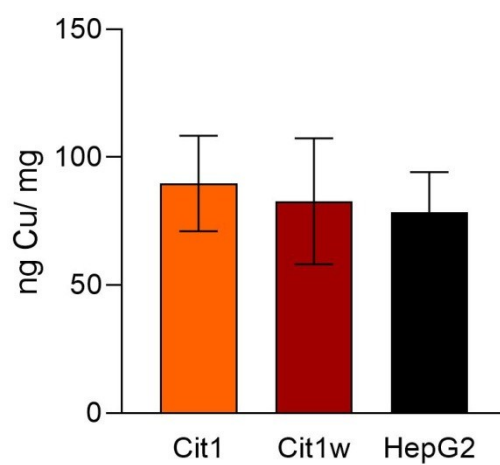

### Supplementary Figure S3

**Cellular copper accumulation is not affected after long-term treatment of hepatoma cells.**

Intracellular copper was determined by TXRF in Cit1, Cit1w and HepG2 cells after 4 h incubation with 10 mM iron citrate. Mean  $\pm$  SEM is given (n=3).

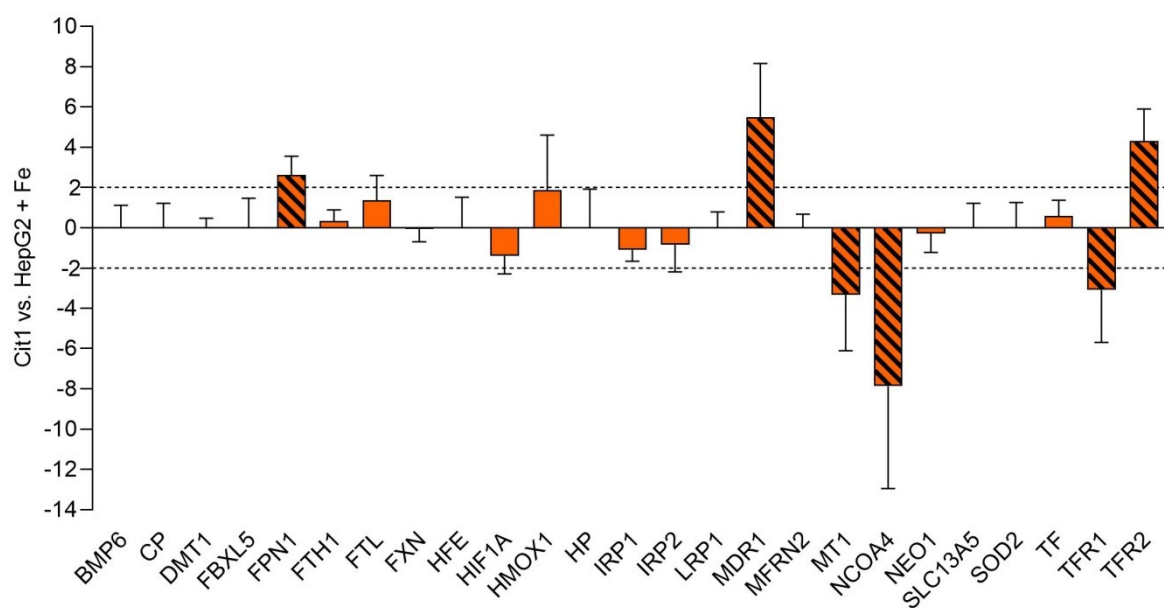

#### Supplementary Figure S4

#### Comparison of gene expression in Cit1 cells versus short-term iron treatment of parental HepG2 cells.

Gene expression of Cit1 cells was compared to parental HepG2 cells that were treated with iron citrate for 24 h. The difference of fold change expression in Cit1 cells relative to untreated HepG2 cells is depicted. Dotted line indicates threshold of a fold  $\pm 2$ . Genes above threshold are highlighted (stippled). Mean/SE are given (n=3-6).



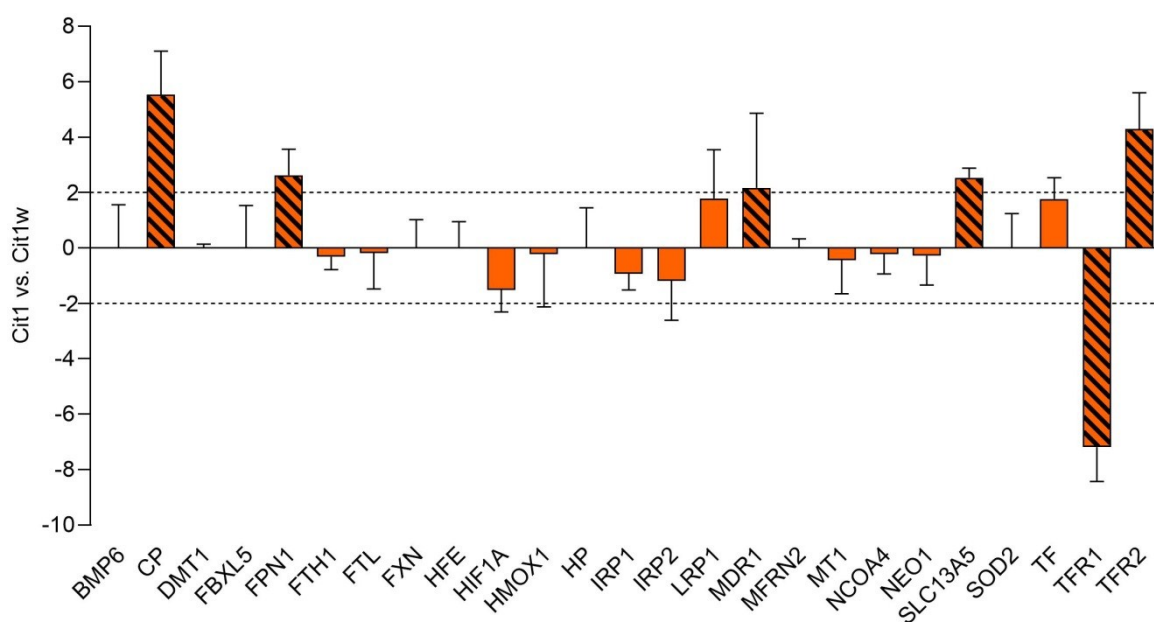

### Supplementary Figure S5

#### Comparison of gene expression in Cit1 cells versus weaned Cit1w cells.

Gene expression of Cit1 cells was compared to weaned Cit1w cells. Note that Cit1 cells were permanently cultivated in 10 mM iron citrate whereas Cit1w cells were weaned for several days. The difference of fold change expression in Cit1 cells relative to untreated Cit1w cells is depicted. Dotted line indicates threshold of a fold  $\pm 2$ . Genes above threshold are highlighted (stippled). Mean/SE are given (n=3-6).
